# Supplementary material for: A family of lanthanide compounds with reduced nitronyl nitroxide diradical: syntheses, structures and magnetic properties
Source: Royal Society of Chemistry journal article supplement (doi:10.1039/c8dt01112e), 2018-01-01
Supplement: c8dt01112e1.pdf [file c8dt01112e1.pdf]

## Supporting Information

### **A family of lanthanide compounds with reduced nitronyl nitroxide diradical: syntheses, structures and magnetic properties**

Zhao-Xin Xiao,<sup>a</sup> Hao Miao,<sup>a</sup> Dong Shao,<sup>a</sup> Hai-Yan Wei,<sup>\*b</sup> Yi-Quan Zhang,<sup>†c</sup> and Xin-Yi Wang<sup>\*a</sup>

---

<sup>a</sup> *State Key Laboratory of Coordination Chemistry, Collaborative Innovation Center of Advanced Microstructures, School of Chemistry and Chemical Engineering, Nanjing University, Nanjing, 210023, China. E-mail: wangxy66@nju.edu.cn.*

<sup>b</sup> *Jiangsu Key Laboratory of Biofunctional Materials, School of Chemistry and Materials Science, Nanjing Normal University, Nanjing, 210023, China. Email: weihaiyan@nju.edu.cn.*

<sup>c</sup> *Jiangsu Key Laboratory for NSLSCS, School of Physical Science and Technology, Nanjing Normal University, Nanjing 210023, China. E-mail: zhangyiquan@nju.edu.cn*

|                                                                                                                                                                                                                                                                                                                                                                                                                                                                                         |    |
|-----------------------------------------------------------------------------------------------------------------------------------------------------------------------------------------------------------------------------------------------------------------------------------------------------------------------------------------------------------------------------------------------------------------------------------------------------------------------------------------|----|
| 1. X-ray crystallography and powder x-ray diffraction.....                                                                                                                                                                                                                                                                                                                                                                                                                              | 3  |
| <b>Table S1.</b> Selected bond lengths [Å] and angles [°] for radical <b>1</b> .....                                                                                                                                                                                                                                                                                                                                                                                                    | 3  |
| <b>Table S2.</b> Selected bond lengths [Å] and angles [°] for complex <b>2<sub>Gd</sub></b> .....                                                                                                                                                                                                                                                                                                                                                                                       | 3  |
| <b>Table S3.</b> Selected bond lengths [Å] and angles [°] for complex <b>3<sub>Dy</sub></b> .....                                                                                                                                                                                                                                                                                                                                                                                       | 3  |
| <b>Table S4.</b> Selected bond lengths [Å] and angles [°] for complex <b>4<sub>Ho</sub></b> .....                                                                                                                                                                                                                                                                                                                                                                                       | 3  |
| <b>Table S5.</b> Selected bond lengths [Å] and angles [°] for complex <b>5<sub>Er</sub></b> .....                                                                                                                                                                                                                                                                                                                                                                                       | 3  |
| <b>Table S6.</b> Selected bond lengths [Å] and angles [°] for complex <b>6<sub>Tm</sub></b> .....                                                                                                                                                                                                                                                                                                                                                                                       | 4  |
| <b>Table S7.</b> Selected bond lengths [Å] and angles [°] for complex <b>7<sub>Yb</sub></b> .....                                                                                                                                                                                                                                                                                                                                                                                       | 4  |
| <b>Table S8.</b> Lanthanide geometry analysis by using the Shape software for <b>2<sub>Gd</sub>-7<sub>Yb</sub></b> .....                                                                                                                                                                                                                                                                                                                                                                | 4  |
| <b>Fig. S1</b> X-ray powder diffraction pattern of complex <b>2<sub>Gd</sub></b> .....                                                                                                                                                                                                                                                                                                                                                                                                  | 5  |
| <b>Fig. S2</b> X-ray powder diffraction pattern of complex <b>3<sub>Dy</sub></b> .....                                                                                                                                                                                                                                                                                                                                                                                                  | 5  |
| <b>Fig. S3</b> X-ray powder diffraction pattern of complex <b>4<sub>Ho</sub></b> .....                                                                                                                                                                                                                                                                                                                                                                                                  | 6  |
| <b>Fig. S4</b> X-ray powder diffraction pattern of complex <b>5<sub>Er</sub></b> .....                                                                                                                                                                                                                                                                                                                                                                                                  | 6  |
| <b>Fig. S5</b> X-ray powder diffraction pattern of complex <b>6<sub>Tm</sub></b> .....                                                                                                                                                                                                                                                                                                                                                                                                  | 7  |
| <b>Fig. S6</b> X-ray powder diffraction pattern of complex <b>7<sub>Yb</sub></b> .....                                                                                                                                                                                                                                                                                                                                                                                                  | 7  |
| 2. Magnetic Properties.....                                                                                                                                                                                                                                                                                                                                                                                                                                                             | 7  |
| <b>Fig. S7</b> Field dependent magnetization at 2 K for diradical <b>1</b> .....                                                                                                                                                                                                                                                                                                                                                                                                        | 8  |
| <b>Fig. S8</b> The real and imaginary components of ac magnetic susceptibilities for <b>2<sub>Gd</sub></b> at 2 K under zero applied external dc field (left) and a dc field of 1000 Oe (right).....                                                                                                                                                                                                                                                                                    | 8  |
| <b>Fig. S9</b> The real and imaginary components of ac magnetic susceptibility for <b>3<sub>Dy</sub></b> at 2 K under zero applied external dc field (left) and a dc field of 1000 Oe (right).....                                                                                                                                                                                                                                                                                      | 9  |
| <b>Fig. S10</b> The real and imaginary components of ac magnetic susceptibility for <b>4<sub>Ho</sub></b> at 2 K under zero applied external dc field (left) and a dc field of 1000 Oe (right).....                                                                                                                                                                                                                                                                                     | 9  |
| <b>Fig. S11</b> The real and imaginary components of ac magnetic susceptibility for <b>5<sub>Er</sub></b> at 2 K under zero applied external dc field (left) and a dc field of 1000 Oe (right).....                                                                                                                                                                                                                                                                                     | 10 |
| <b>Fig. S12</b> The real and imaginary components of ac magnetic susceptibility for <b>6<sub>Tm</sub></b> at 2 K under zero applied external dc field (left) and a dc field of 1000 Oe (right).....                                                                                                                                                                                                                                                                                     | 10 |
| <b>Fig. S13</b> The real and imaginary components of ac magnetic susceptibility for <b>7<sub>Yb</sub></b> under zero applied external dc field at 2 K.....                                                                                                                                                                                                                                                                                                                              | 11 |
| <b>Table S9</b> Fitting parameters of Cole-Cole plots of for <b>7<sub>Yb</sub></b> under 1000 Oe applied dc field.....                                                                                                                                                                                                                                                                                                                                                                  | 11 |
| <b>Details for calculations</b> .....                                                                                                                                                                                                                                                                                                                                                                                                                                                   | 11 |
| <b>Fig. S14.</b> Calculated model structure of individual Ln <sup>III</sup> fragment; H atoms are omitted. ....                                                                                                                                                                                                                                                                                                                                                                         | 13 |
| <b>Table S10</b> Calculated energy levels (cm <sup>-1</sup> ), <i>g</i> ( <i>g<sub>x</sub></i> , <i>g<sub>y</sub></i> , <i>g<sub>z</sub></i> ) tensors and <i>m<sub>J</sub></i> values of the lowest eight, eight and four Kramers doublets for individual Dy <sup>III</sup> , Er <sup>III</sup> and Yb <sup>III</sup> fragments, respectively, and the lowest nine and seven non-Kramers doublets for individual Ho <sup>III</sup> and Tm <sup>III</sup> fragments, respectively. .... | 13 |
| <b>References</b> .....                                                                                                                                                                                                                                                                                                                                                                                                                                                                 | 14 |

# 1. X-ray crystallography and powder x-ray diffraction

**Table S1.** Selected bond lengths [Å] and angles [°] for radical **1**.

|                |            |                |            |
|----------------|------------|----------------|------------|
| O(2)-N(2)      | 1.271(2)   | O(1)-N(1)-C(7) | 125.85(19) |
| O(1)-N(1)      | 1.271(3)   | C(7)-N(1)-C(5) | 111.28(17) |
| N(2)-C(7)      | 1.340(3)   | N(3)-C(8)-C(7) | 115.00(18) |
| N(1)-C(7)      | 1.329(3)   | N(1)-C(7)-N(2) | 110.57(18) |
| C(8)-C(7)      | 1.486(3)   | N(1)-C(7)-C(8) | 125.62(19) |
| O(2)-N(2)-C(7) | 126.05(17) | N(2)-C(7)-C(8) | 123.80(19) |

**Table S2.** Selected bond lengths [Å] and angles [°] for complex **2<sub>Gd</sub>**.

|            |          |                 |          |
|------------|----------|-----------------|----------|
| Gd(1)-O(4) | 2.363(5) | Gd(1)-O(2)      | 2.473(5) |
| Gd(1)-O(1) | 2.376(4) | Gd(1)-O(8)      | 2.485(5) |
| Gd(1)-O(7) | 2.383(5) | O(1)-N(1)       | 1.368(7) |
| Gd(1)-O(3) | 2.389(5) | N(1)-C(19)      | 1.320(8) |
| Gd(1)-O(6) | 2.432(5) | N(2)-C(19)      | 1.352(9) |
| Gd(1)-O(5) | 2.444(5) | N(1)-O(1)-Gd(1) | 129.5(3) |

**Table S3.** Selected bond lengths [Å] and angles [°] for complex **3<sub>Dy</sub>**.

|            |          |                 |            |
|------------|----------|-----------------|------------|
| Dy(1)-O(3) | 2.314(2) | Dy(1)-O(4)      | 2.415(2)   |
| Dy(1)-O(1) | 2.314(2) | Dy(1)-O(8)      | 2.421(2)   |
| Dy(1)-O(7) | 2.331(2) | O(1)-N(1)       | 1.357(3)   |
| Dy(1)-O(5) | 2.342(2) | N(1)-C(22)      | 1.291(4)   |
| Dy(1)-O(6) | 2.376(2) | N(2)-C(22)      | 1.341(4)   |
| Dy(1)-O(2) | 2.392(2) | N(1)-O(1)-Dy(1) | 129.95(16) |

**Table S4.** Selected bond lengths [Å] and angles [°] for complex **4<sub>Ho</sub>**.

|            |          |                 |          |
|------------|----------|-----------------|----------|
| Ho(1)-O(3) | 2.295(4) | Ho(1)-O(4)      | 2.403(4) |
| Ho(1)-O(1) | 2.304(4) | Ho(1)-O(8)      | 2.409(4) |
| Ho(1)-O(7) | 2.317(4) | O(1)-N(1)       | 1.361(5) |
| Ho(1)-O(5) | 2.335(4) | N(1)-C(7)       | 1.298(7) |
| Ho(1)-O(6) | 2.359(4) | N(2)-C(7)       | 1.351(7) |
| Ho(1)-O(2) | 2.384(4) | N(1)-O(1)-Ho(1) | 129.9(3) |

**Table S5.** Selected bond lengths [Å] and angles [°] for complex **5<sub>Er</sub>**.

|            |          |                 |          |
|------------|----------|-----------------|----------|
| Er(1)-O(3) | 2.286(4) | Er(1)-O(8)      | 2.402(4) |
| Er(1)-O(1) | 2.291(3) | Er(1)-O(4)      | 2.403(4) |
| Er(1)-O(7) | 2.306(4) | O(1)-N(1)       | 1.351(5) |
| Er(1)-O(5) | 2.323(4) | N(1)-C(7)       | 1.305(6) |
| Er(1)-O(6) | 2.357(4) | N(2)-C(7)       | 1.342(7) |
| Er(1)-O(2) | 2.369(4) | N(1)-O(1)-Er(1) | 129.6(3) |

**Table S6.** Selected bond lengths [Å] and angles [°] for complex **6<sub>Tm</sub>**.

|            |          |                 |          |
|------------|----------|-----------------|----------|
| Tm(1)-O(1) | 2.283(3) | Tm(1)-O(6)      | 2.395(3) |
| Tm(1)-O(5) | 2.284(4) | Tm(1)-O(8)      | 2.397(3) |
| Tm(1)-O(2) | 2.298(3) | O(1)-N(1)       | 1.358(5) |
| Tm(1)-O(7) | 2.313(3) | N(1)-C(22)      | 1.299(6) |
| Tm(1)-O(3) | 2.353(3) | N(2)-C(22)      | 1.345(6) |
| Tm(1)-O(4) | 2.372(3) | N(1)-O(1)-Tm(1) | 130.0(2) |

**Table S7.** Selected bond lengths [Å] and angles [°] for complex **7<sub>Yb</sub>**.

|            |          |                 |          |
|------------|----------|-----------------|----------|
| Yb(1)-O(3) | 2.269(3) | Yb(1)-O(8)      | 2.365(3) |
| Yb(1)-O(1) | 2.277(3) | Yb(1)-O(4)      | 2.374(3) |
| Yb(1)-O(7) | 2.295(3) | O(1)-N(1)       | 1.351(5) |
| Yb(1)-O(5) | 2.296(3) | N(1)-C(7)       | 1.296(6) |
| Yb(1)-O(6) | 2.328(3) | N(2)-C(7)       | 1.348(6) |
| Yb(1)-O(2) | 2.352(3) | N(1)-O(1)-Yb(1) | 129.2(2) |

**Table S8.** Lanthanide geometry analysis by using the Shape software for **2<sub>Gd</sub>-7<sub>Yb</sub>**.

| Compound<br>Label | 2 <sub>Gd</sub> | 3 <sub>Dy</sub> | 4 <sub>Ho</sub> | 5 <sub>Er</sub> | 6 <sub>Tm</sub> | 7 <sub>Yb</sub> |
|-------------------|-----------------|-----------------|-----------------|-----------------|-----------------|-----------------|
| <b>OP-8</b>       | 30.442          | 30.476          | 30.448          | 30.483          | 30.497          | 30.219          |
| <b>HPY-8</b>      | 22.736          | 22.920          | 22.968          | 22.873          | 22.914          | 22.927          |
| <b>HBPY-8</b>     | 15.270          | 15.444          | 15.521          | 15.442          | 15.547          | 15.518          |
| <b>CU-8</b>       | 8.528           | 8.637           | 8.717           | 8.665           | 8.730           | 8.606           |
| <b>SAPR-8</b>     | 1.056           | 1.050           | 1.059           | 1.061           | 1.070           | 0.988           |
| <b>TDD-8</b>      | 1.212           | 1.158           | 1.115           | 1.072           | 1.050           | 1.095           |
| <b>JGBF-8</b>     | 14.833          | 14.928          | 14.959          | 15.150          | 15.264          | 15.164          |
| <b>JETBPY-8</b>   | 28.383          | 28.541          | 28.764          | 28.757          | 28.757          | 28.804          |
| <b>JBTP-8</b>     | 2.252           | 2.220           | 2.153           | 2.172           | 2.180           | 2.214           |
| <b>BTPR-8</b>     | 1.891           | 1.887           | 1.873           | 1.874           | 1.873           | 1.893           |
| <b>JSD-8</b>      | 3.747           | 3.662           | 3.560           | 3.529           | 3.438           | 3.615           |
| <b>TT-8</b>       | 9.164           | 9.260           | 9.315           | 9.280           | 9.309           | 9.245           |
| <b>ETBPY-8</b>    | 23.452          | 23.779          | 23.902          | 23.830          | 23.990          | 23.881          |

| Label           | Code | Symmetry | Shape                                          |
|-----------------|------|----------|------------------------------------------------|
| <b>OP-8</b>     | 1    | D8h      | Octagon                                        |
| <b>HPY-8</b>    | 2    | C7v      | Heptagonal pyramid                             |
| <b>HBPY-8</b>   | 3    | D6h      | Hexagonal bipyramid                            |
| <b>CU-8</b>     | 4    | Oh       | Cube                                           |
| <b>SAPR-8</b>   | 5    | D4d      | Square antiprism                               |
| <b>TDD-8</b>    | 6    | D2d      | Triangular dodecahedron                        |
| <b>JGBF-8</b>   | 7    | D2d      | Johnson - Gyrobifastigium (J26)                |
| <b>JETBPY-8</b> | 8    | D3h      | Johnson - Elongated triangular bipyramid (J14) |

|                |    |     |                                            |
|----------------|----|-----|--------------------------------------------|
| <b>JBTP-8</b>  | 9  | C2v | Johnson - Biaugmented trigonal prism (J50) |
| <b>BTPR-8</b>  | 10 | C2v | Biaugmented trigonal prism                 |
| <b>JSD-8</b>   | 11 | D2d | Snub disphenoid (J84)                      |
| <b>TT-8</b>    | 12 | Td  | Triakis tetrahedron                        |
| <b>ETBPY-8</b> | 13 | D3h | Elongated trigonal bipyramid               |

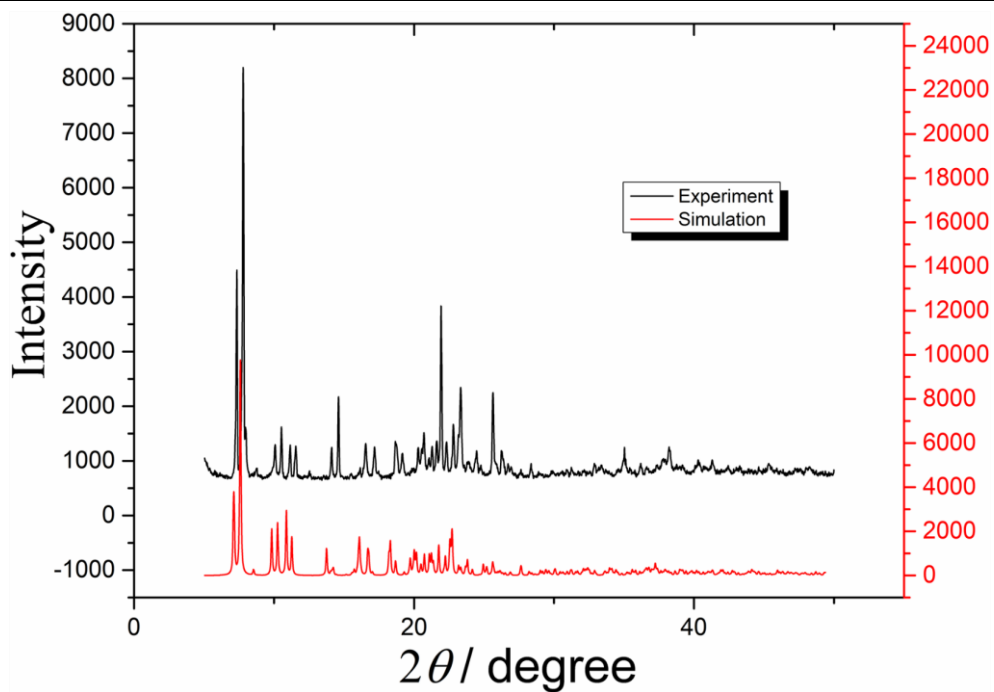

**Fig. S1** X-ray powder diffraction pattern of complex **2<sub>Ga</sub>**.

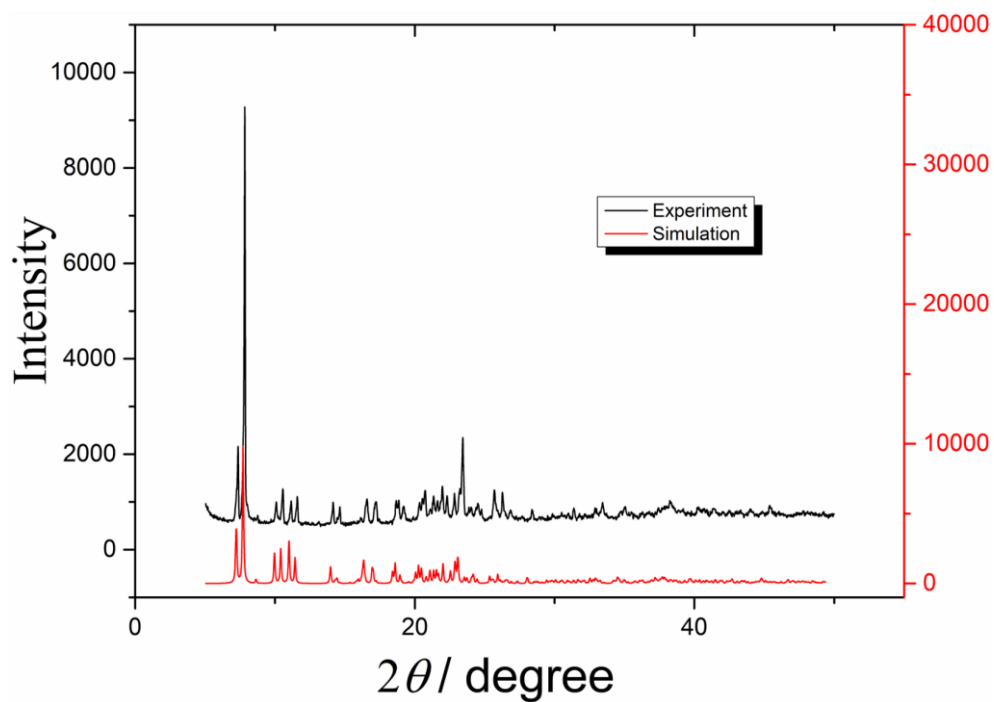

**Fig. S2** X-ray powder diffraction pattern of complex **3<sub>Dy</sub>**.

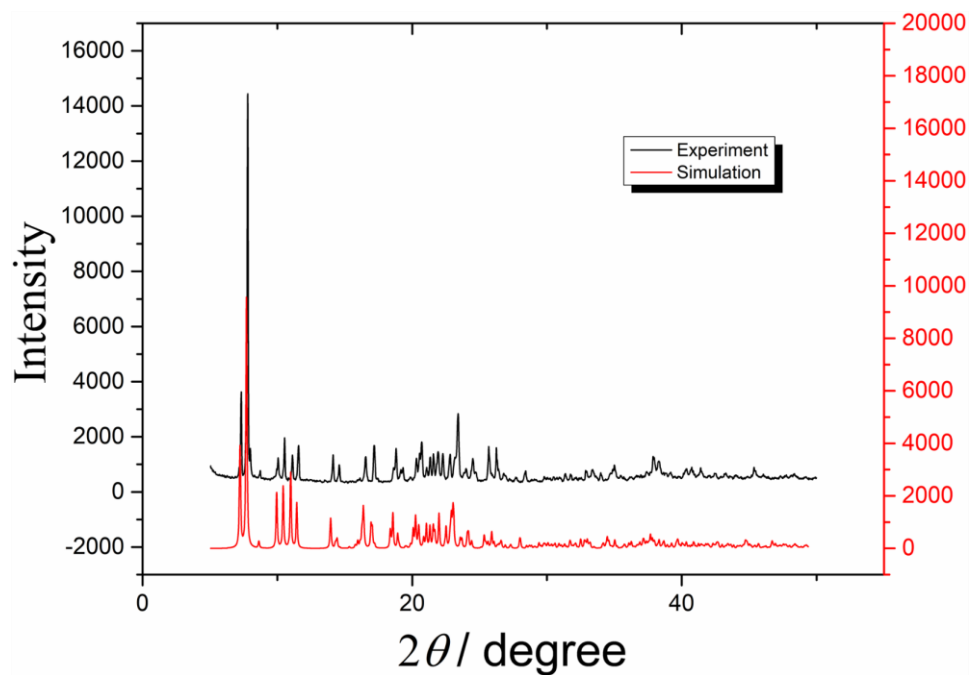

**Fig. S3** X-ray powder diffraction pattern of complex  $4_{H_0}$ .

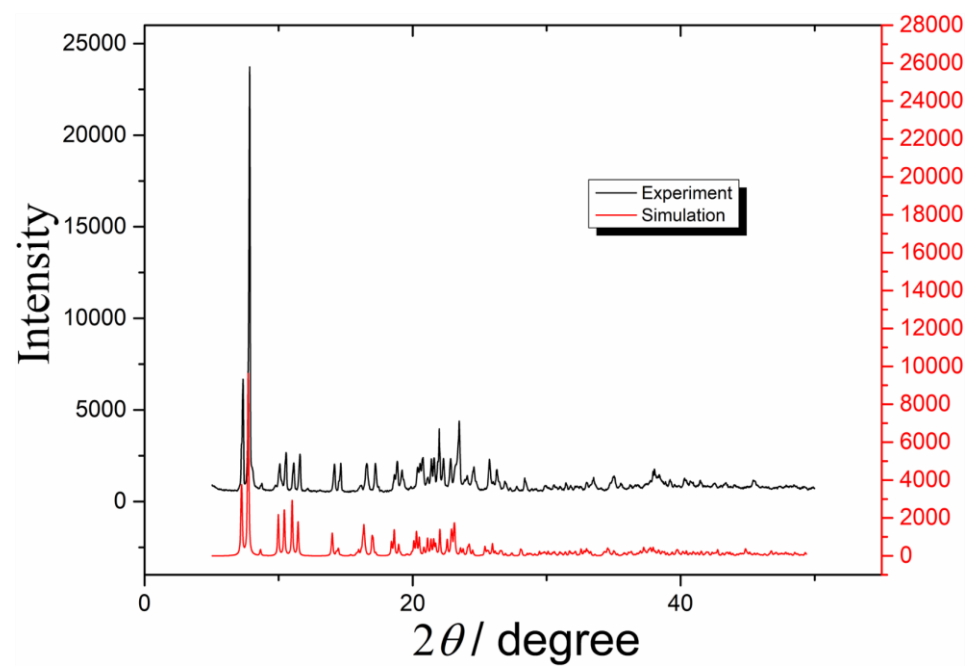

**Fig. S4** X-ray powder diffraction pattern of complex  $5_{Er}$ .

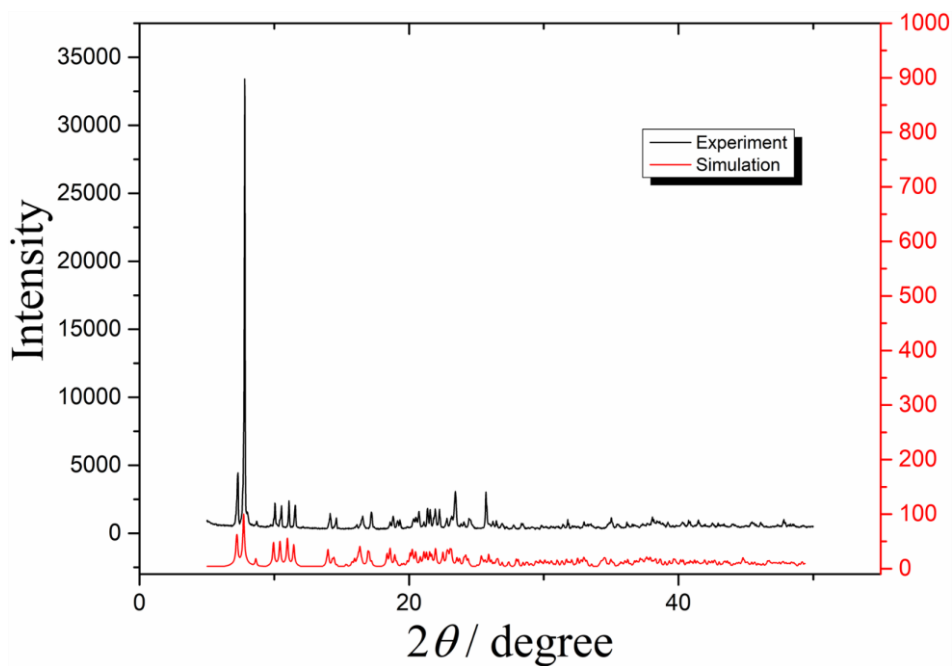

**Fig. S5** X-ray powder diffraction pattern of complex **6<sub>Tm</sub>**.

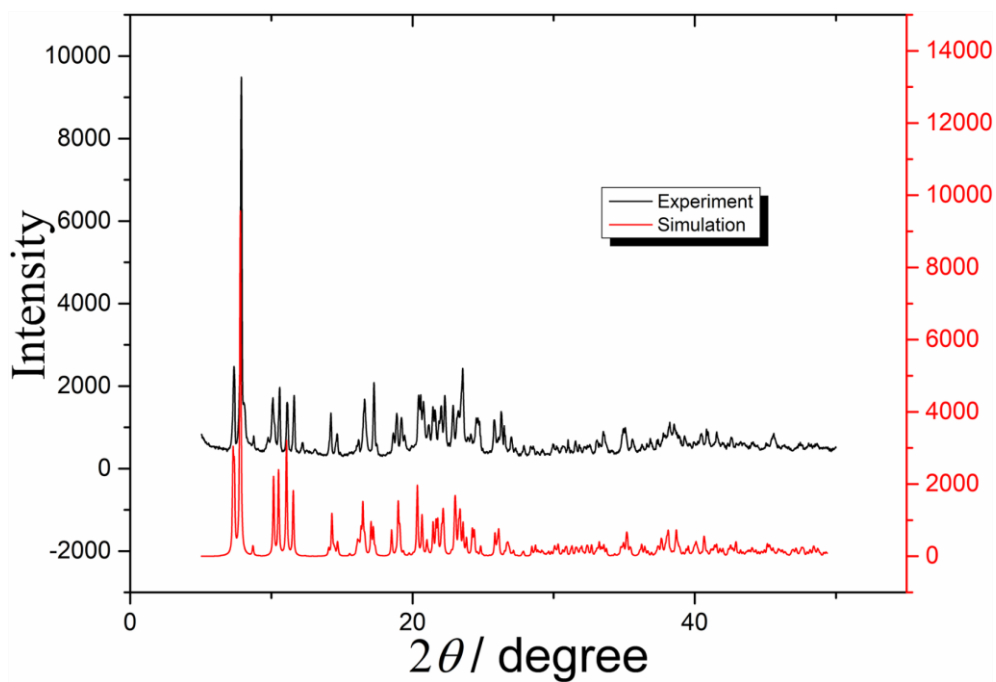

**Fig. S6** X-ray powder diffraction pattern of complex **7<sub>Yb</sub>**.

## 2. Magnetic Properties

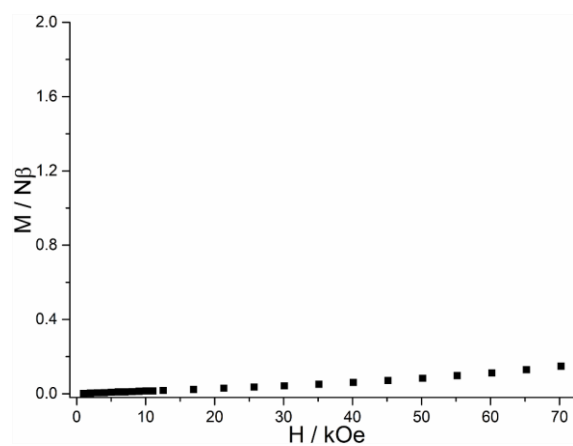

**Fig. S7** Field dependent magnetization at 2 K for diradical **1**.

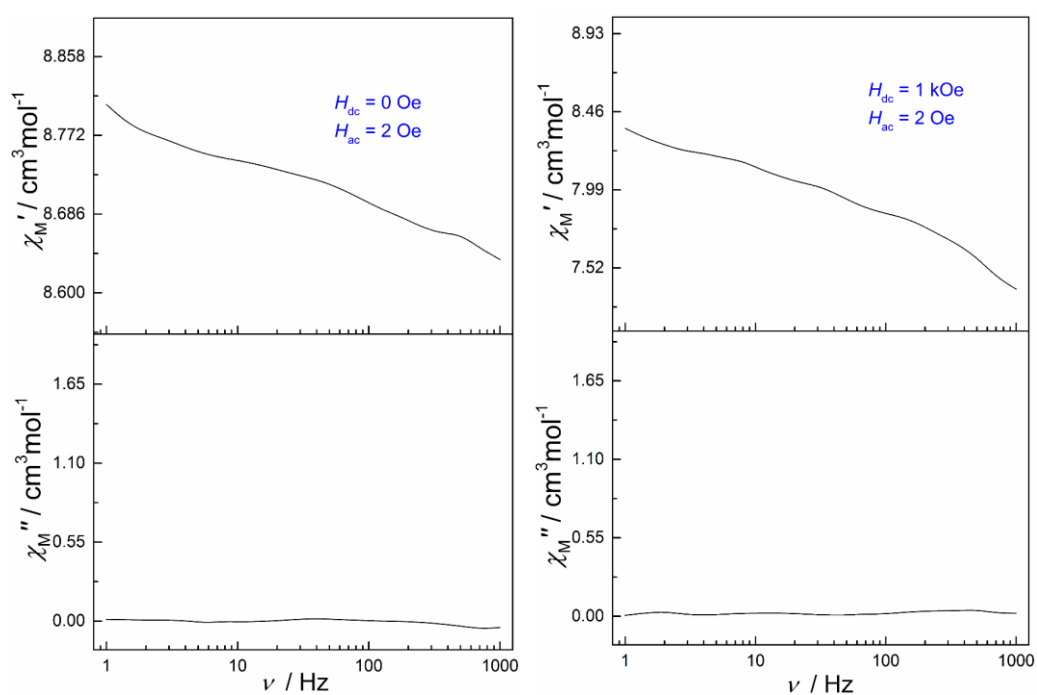

**Fig. S8** The real and imaginary components of ac magnetic susceptibilities for **2Ga** at 2 K under zero applied external dc field (left) and a dc field of 1000 Oe (right).



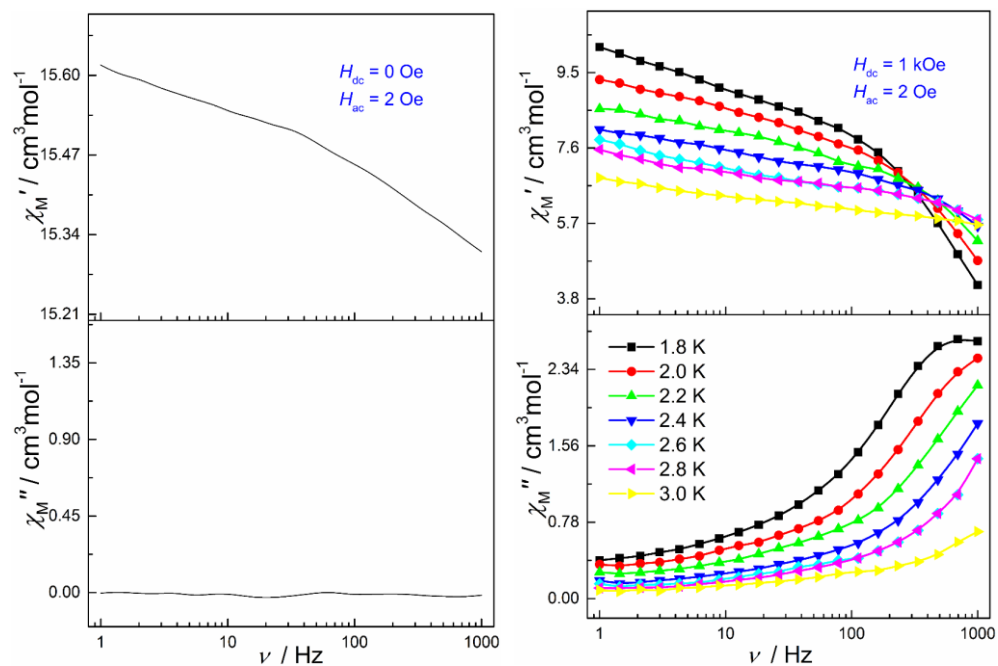

**Fig. S9** The real and imaginary components of ac magnetic susceptibility for  $3_{\text{Dy}}$  at 2 K under zero applied external dc field (left) and a dc field of 1000 Oe (right).

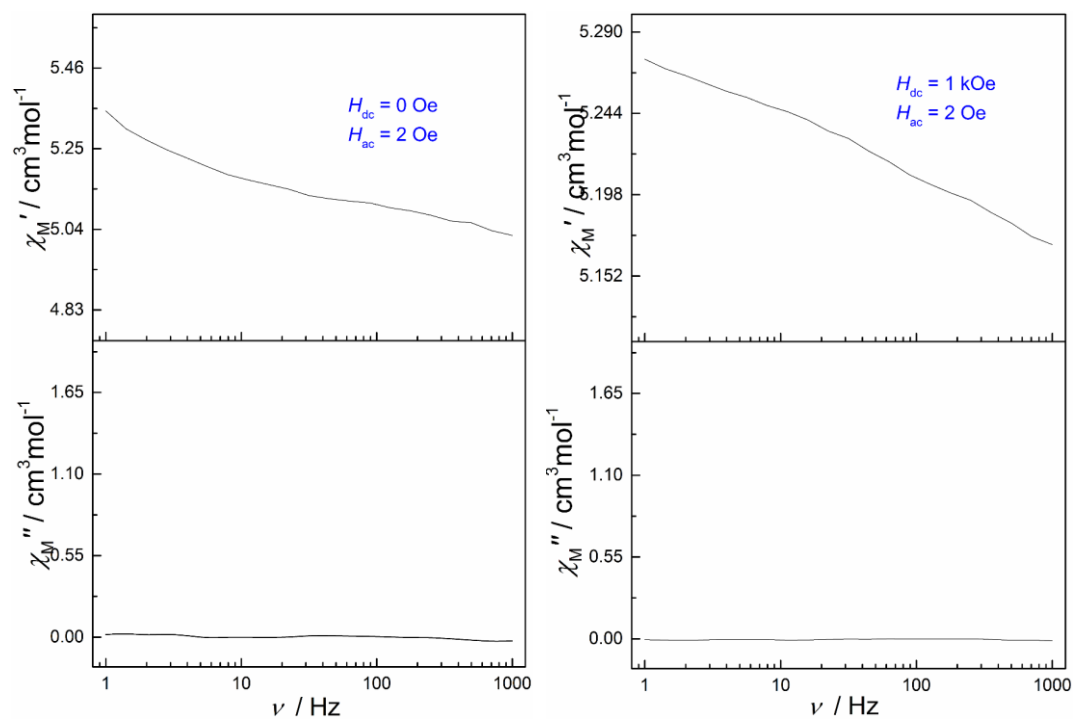

**Fig. S10** The real and imaginary components of ac magnetic susceptibility for  $4_{\text{Ho}}$  at 2 K under zero applied external dc field (left) and a dc field of 1000 Oe (right).

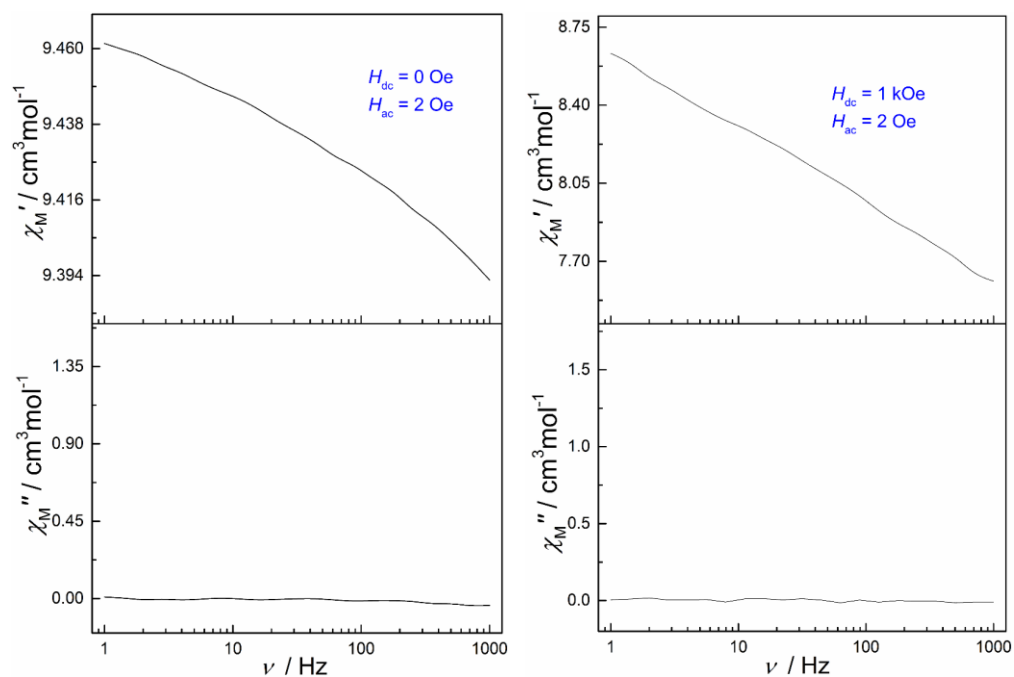

**Fig. S11** The real and imaginary components of ac magnetic susceptibility for  $5\text{Er}$  at 2 K under zero applied external dc field (left) and a dc field of 1000 Oe (right).

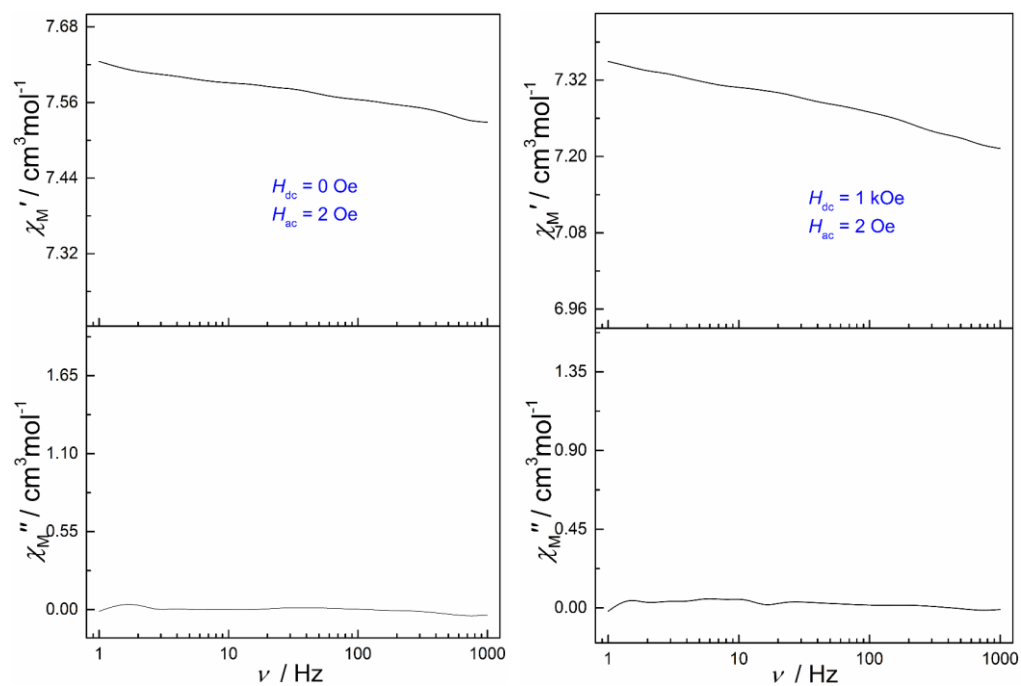

**Fig. S12** The real and imaginary components of ac magnetic susceptibility for  $6\text{Tm}$  at 2 K under zero applied external dc field (left) and a dc field of 1000 Oe (right).

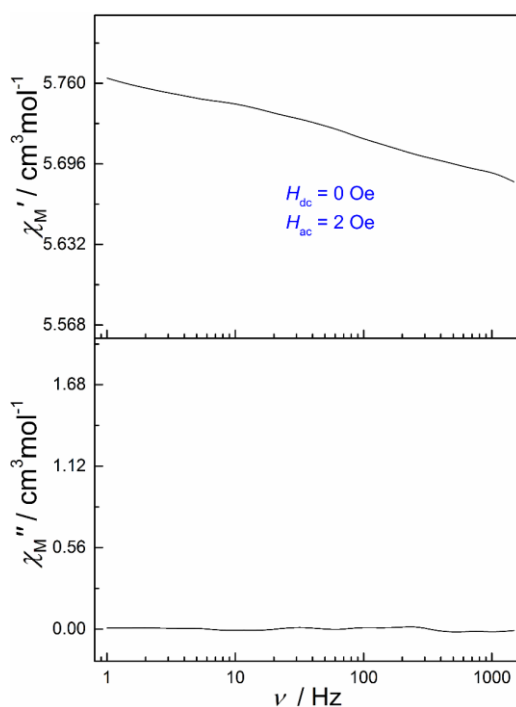

**Fig. S13** The real and imaginary components of ac magnetic susceptibility for  $7\text{Yb}$  under zero applied external dc field at 2 K.

**Table S9** Fitting parameters of Cole-Cole plots of for  $7\text{Yb}$  under 1000 Oe applied dc field.

| $T$ (K) | $\chi^0$ | $\chi^t$ | $\tau$  | $\alpha$ |
|---------|----------|----------|---------|----------|
| 1.8     | 0.11599  | 1.92010  | 0.00431 | 0.16171  |
| 2.0     | 0.10574  | 1.69948  | 0.00279 | 0.13514  |
| 2.2     | 0.10571  | 1.54446  | 0.00180 | 0.10402  |
| 2.4     | 0.09799  | 1.41033  | 0.00113 | 0.08060  |
| 2.6     | 0.09927  | 1.30300  | 0.00072 | 0.05840  |
| 2.8     | 0.10151  | 1.22460  | 0.00047 | 0.04318  |
| 3.0     | 0.11825  | 1.13885  | 0.00031 | 0.01754  |
| 3.2     | 0.11000  | 1.06819  | 0.00021 | 0.01576  |
| 3.4     | 0.10249  | 1.00752  | 0.00014 | 0.00565  |
| 3.5     | 0.04983  | 0.97950  | 0.00011 | 0.03063  |

## Details for calculations

Complete-active-space self-consistent field (CASSCF) calculations on individual  $\text{Dy}^{\text{III}}$ ,  $\text{Ho}^{\text{III}}$ ,  $\text{Er}^{\text{III}}$ ,  $\text{Tm}^{\text{III}}$  and  $\text{Yb}^{\text{III}}$  fragments (see Figure S14 for the calculated model structures of individual  $\text{Ln}^{\text{III}}$

fragment) extracted from the compounds on the basis of single-crystal X-ray determined geometry have been carried out with MOLCAS 8.2 program package<sup>S1</sup> (see Figure S2 for the complete structures). In the calculation of individual Dy<sup>III</sup> Ho<sup>III</sup>, Er<sup>III</sup>, Tm<sup>III</sup> and Yb<sup>III</sup> fragments, the influence of distant Dy<sup>III</sup> Ho<sup>III</sup>, Er<sup>III</sup>, Tm<sup>III</sup> and Yb<sup>III</sup> ions were taken into account by the closed-shell La<sup>III</sup> ab initio embedding model potentials (AIMP; La.ECP.deGraaf.0s.0s.0e-La-(LaMnO3.), respectively.<sup>S2</sup>

The basis sets for all atoms are atomic natural orbitals from the MOLCAS ANO-RCC library: ANO-RCC-VTZP for Dy<sup>III</sup>, Ho<sup>III</sup>, Er<sup>III</sup>, Tm<sup>III</sup> and Yb<sup>III</sup> ions, respectively; VTZ for close O; VDZ for distant atoms. The calculations employed the second order Douglas-Kroll-Hess Hamiltonian, where scalar relativistic contractions were taken into account in the basis set and the spin-orbit couplings were handled separately in the restricted active space state interaction (RASSI-SO) procedure. Active electrons in 7 active spaces include all *f* electrons (CAS (9 in 7 for Dy<sup>III</sup>, 10 in 7 for Ho<sup>III</sup>, 11 in 7 for Er<sup>III</sup>, 12 in 7 for Tm<sup>III</sup>, 13 in 7 for Yb<sup>III</sup>)) in the CASSCF calculations. To exclude all the doubts, we calculated all the roots in the active space. We have mixed the maximum number of spin-free state which was possible with our hardware (all from 21 sextets, 128 from 224 quadruplets and 130 from 490 doublets for individual Dy<sup>III</sup> fragment; all from 35 septuplets, 150 from 210 triplets and 120 from 196 singlets for individual Ho<sup>III</sup> fragment; all from 35 quadruplets and all from 112 doublets for individual Er<sup>III</sup> fragment; all from 21 triplets and all from 68 singlets for individual Tm<sup>III</sup> fragment; all from 21 sextets, all from 7 doublets for individual Yb<sup>III</sup> fragment). And then, Single–Aniso<sup>S3</sup> program was used to obtain the *g* tensors, energy levels, magnetic axes, *et al.*, based on the above CASSCF/RASSI calculations.

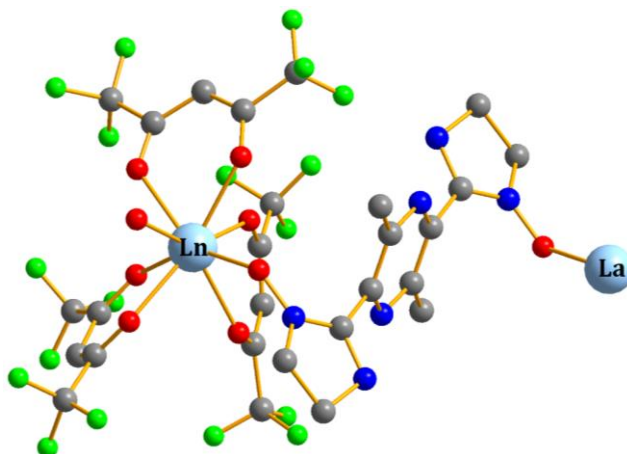

**Fig. S14.** Calculated model structure of individual Ln<sup>III</sup> fragment; H atoms are omitted.

**Table S10** Calculated energy levels (cm<sup>-1</sup>), **g** ( $g_x$ ,  $g_y$ ,  $g_z$ ) tensors and  $m_J$  values of the lowest eight, eight and four Kramers doublets for individual Dy<sup>III</sup>, Er<sup>III</sup> and Yb<sup>III</sup> fragments, respectively, and the lowest nine and seven non-Kramers doublets for individual Ho<sup>III</sup> and Tm<sup>III</sup> fragments, respectively.

|   | Dy <sup>III</sup>  |          |            | Ho <sup>III</sup>  |          |         | Er <sup>III</sup>  |          |            |
|---|--------------------|----------|------------|--------------------|----------|---------|--------------------|----------|------------|
|   | $E/\text{cm}^{-1}$ | <b>g</b> | $m_J$      | $E/\text{cm}^{-1}$ | <b>g</b> | $m_J$   | $E/\text{cm}^{-1}$ | <b>g</b> | $m_J$      |
| 1 | 0.0                | 0.433    | $\pm 15/2$ | 0.0                | 0.000    | $\pm 8$ | 0.0                | 3.804    | $\pm 15/2$ |
|   |                    | 1.592    |            | 0.000              | 4.198    |         |                    |          |            |
|   |                    | 17.263   |            | 14.945             | 11.352   |         |                    |          |            |
| 2 | 43.8               | 2.781    | $\pm 9/2$  | 16.5               | 0.000    | $\pm 6$ | 14.3               | 0.502    | $\pm 1/2$  |
|   |                    | 3.655    |            | 30.4               | 11.350   |         | 3.862              | 10.759   |            |
| 3 | 78.5               | 1.593    | $\pm 1/2$  | 51.8               | 0.000    | $\pm 2$ | 41.9               | 0.941    | $\pm 11/2$ |
|   |                    | 3.973    |            | 74.5               | 8.768    |         |                    | 1.260    |            |
| 4 | 127.2              | 3.580    | $\pm 5/2$  | 87.5               | 0.000    | $\pm 4$ | 82.9               | 1.452    | $\pm 5/2$  |
|   |                    | 4.568    |            | 95.3               | 12.262   |         |                    | 2.946    |            |
| 5 | 159.5              | 0.739    | $\pm 3/2$  | 126.0              | 0.000    | $\pm 1$ | 150.5              | 0.104    | $\pm 13/2$ |
|   |                    | 3.647    |            | 146.7              | 10.315   |         |                    | 3.948    |            |
| 6 | 194.7              | 0.971    | $\pm 7/2$  | 181.9              | 0.000    | $\pm 7$ | 167.2              | 0.620    | $\pm 3/2$  |
|   |                    | 1.722    |            | 182.8              | 17.334   |         |                    | 2.452    |            |
| 7 | 229.2              | 0.210    | $\pm 11/2$ | 197.4              |          | $\pm 0$ | 223.1              | 2.086    | $\pm 7/2$  |
|   |                    | 0.390    |            |                    |          |         |                    | 3.491    |            |
|   |                    | 18.507   |            |                    |          |         |                    |          |            |

|     |                          |          |                      |                          |          |                      |       |        |      |
|-----|--------------------------|----------|----------------------|--------------------------|----------|----------------------|-------|--------|------|
| 8   | 370.9                    | 0.011    | ±13/2                | 215.0                    | 0.000    | ±3                   | 247.1 | 0.261  | ±9/2 |
|     |                          | 0.019    |                      | 224.3                    | 0.000    |                      |       | 2.848  |      |
|     |                          | 19.781   |                      |                          | 10.084   |                      |       | 12.741 |      |
| 9   |                          |          |                      | 227.7                    | 0.000    | ±5                   |       |        |      |
|     |                          |          |                      | 231.5                    | 0.000    |                      |       |        |      |
| KDs | <b>Tm<sup>III</sup></b>  |          |                      | <b>Yb<sup>III</sup></b>  |          |                      |       |        |      |
|     | <i>E/cm<sup>-1</sup></i> | <b>g</b> | <i>m<sub>J</sub></i> | <i>E/cm<sup>-1</sup></i> | <b>g</b> | <i>m<sub>J</sub></i> |       |        |      |
| 1   | 0.0                      | 0.000    | ±6                   | 0.0                      | 0.577    | ±7/2                 |       |        |      |
|     | 1.5                      | 0.000    |                      |                          | 1.153    |                      |       |        |      |
|     |                          | 13.708   |                      |                          | 6.649    |                      |       |        |      |
| 2   | 97.6                     | 0.000    | ±3                   | 168.0                    | 1.188    | ±5/2                 |       |        |      |
|     | 101.4                    | 0.000    |                      |                          | 1.971    |                      |       |        |      |
|     |                          | 13.092   |                      |                          | 5.887    |                      |       |        |      |
| 3   | 142.6                    | 0.000    | ±1                   | 248.3                    | 3.221    | ±3/2                 |       |        |      |
|     | 156.1                    | 0.000    |                      |                          | 1.738    |                      |       |        |      |
|     |                          | 10.711   |                      |                          | 0.030    |                      |       |        |      |
| 4   | 173.5                    | 0.000    | ±4                   | 318.2                    | 1.008    | ±1/2                 |       |        |      |
|     | 219.0                    | 0.000    |                      |                          | 3.016    |                      |       |        |      |
|     |                          | 8.029    |                      |                          | 5.818    |                      |       |        |      |
| 5   | 244.6                    | 0.000    | ±2                   |                          |          |                      |       |        |      |
|     | 247.7                    | 0.000    |                      |                          |          |                      |       |        |      |
|     |                          | 5.283    |                      |                          |          |                      |       |        |      |
| 6   | 275.1                    |          | ±0                   |                          |          |                      |       |        |      |
| 7   | 307.9                    | 0.000    | ±5                   |                          |          |                      |       |        |      |
|     | 316.0                    | 0.000    |                      |                          |          |                      |       |        |      |
|     |                          | 11.554   |                      |                          |          |                      |       |        |      |

## References

- S1 (a) Aquilante, F.; De Vico, L.; Ferré, N.; Ghigo, G.; Malmqvist, P.-Å.; Neogrady, P.; Pedersen, T. B.; Pitonak, M.; Reiher, M.; Roos, B. O.; Serrano-Andrés, L.; Urban, M.; Veryazov, V.; Lindh, R. *J. Comput. Chem.*, **2010**, *31*, 224. (b) Veryazov, V.; Widmark, P. -O.; Serrano-Andres, L.; Lindh, R.; Roos, B. O. *Int. J. Quantum Chem.*, **2004**, *100*, 626. (c) Karlström, G.; Lindh, R.; Malmqvist, P. -Å.; Roos, B. O.; Ryde, U.; Veryazov, V.; Widmark, P. -O.; Cossi, M.; Schimmelpfennig, B.; Neogrady, P.; Seijo, L. *Comput. Mater. Sci.*, **2003**, *28*, 222.
- S2 Seijo, L.; Barandiarán, Z. *Computational Chemistry: Reviews of Current Trends*; World Scientific, Inc.: Singapore, 1999; pp 455–152.
- S3 (a) Chibotaru, L. F.; Ungur, L.; Soncini, A. *Angew. Chem. Int. Ed.*, **2008**, *47*, 4126. (b) Ungur, L.; Van den Heuvel, W.; Chibotaru, L. F. *New J. Chem.*, **2009**, *33*, 1224. (c) Chibotaru, L. F.; Ungur, L.; Aronica, C.; Elmoll, H.; Pilet, G.; Luneau, D. *J. Am. Chem. Soc.*, **2008**, *130*, 12445.
